```

      10      20      30      40      50      60
ATGGAAGGCAGTGTGAACTCAAGATAGAAACAAGGGGAAAGGAAGACACAAAAGCAG 60
M  E  G  S  V  E  L  K  I  E  T  K  G  E  R  K  T  Q  K  Q

      70      80      90     100     110     120
AATCCAGTGAGAAAAGGTGGGAAGAGAGTCTGCAAAGTTCTTGGATATATCACAGGAGAT 120
N  P  V  R  K  G  G  K  R  V  C  K  V  L  G  Y  I  T  G  D

      130     140     150     160     170     180
ATGAGAGAGTGTGGAGACTGGCTGCAAGATAAGCCAATCCCGTTTCAGTTTGTGCACTGG 180
M  R  E  F  G  D  W  L  Q  D  K  P  I  P  F  Q  F  V  D  W

      190     200     210     220     230     240
GTCCTGCGAGGGACGTCCCAGGTGATGTTCTGTCAAATAACCCTCTCAGTGGGCTTATCATG 240
V  L  R  G  T  S  Q  V  M  F  V  N  N  P  L  S  G  L  I  M

      250     260     270     280     290     300
ATTGCTGGGTTCTTGTCCAGAATCGTTGGTGGACGATCACAGGTTGTCTGGGAACCGTT 300
I  A  G  F  L  V  Q  N  R  W  W  T  I  T  G  C  L  G  T  V

      310     320     330     340     350     360
GTCTCAACATTTACAGCACTGATTTCTGTGTCAGGACAGATCGGGCCATAGCAGCGGGATTG 360
V  S  T  F  T  A  L  I  L  C  Q  D  R  S  A  I  A  A  G  L

      370     380     390     400     410     420
CATGGCTATAAATGGGGTCTTGGTGGGACTGCTCATAGCAGTGTCTCTGACAAGGGAGAT 420
H  G  Y  N  G  V  L  V  G  L  L  I  A  V  F  S  D  K  G  D

      430     440     450     460     470     480
TTCTATTGGTGGCTTCTCCTGCCTGTTGCTGTTGCATCCATGACCTGCCAATTATTTCC 480
F  Y  W  W  L  L  L  P  V  A  V  A  S  M  T  C  P  I  I  S

      490     500     510     520     530     540
AGTGCTTTAGGCTCAATCTTCCATAAGTGGGATCTTCTGTTTTTACCTTGCCTTTCAAC 540
S  A  L  G  S  I  F  H  K  W  D  L  P  V  F  T  L  P  F  N

      550     560     570     580     590     600
ATGGCACTGACTTTTATACTCAGCTGCCACCGGACACTACAACCTCTTCTTCCCTACAGTC 600
M  A  L  T  L  Y  S  A  A  T  G  H  Y  N  L  F  F  P  T  V

      610     620     630     640     650     660
CTCTTTCAACCTGCAACATCAGTGCCCAATATCACATGGTCCAGAATTGACGTGCCAATG 660
L  F  Q  P  A  T  S  V  P  N  I  T  W  S  R  I  D  V  P  M

      670     680     690     700     710     720
CTATTGCAATCCATTCCGGTCGGCGTTGGTTCAGGTGTATGGCTGTGATAAACCCTGGACT 720
L  L  Q  S  I  P  V  G  V  G  Q  V  Y  G  C  D  N  P  W  T

      730     740     750     760     770     780
GGTGGCATCTTCTGTTAGCTTTTATTCATCTCTTCCGCACTCATTGCTTGCATGCTGGA 780
G  G  I  F  L  V  A  L  F  I  S  S  P  L  I  C  L  H  A  G

      790     800     810     820     830     840
ATCGGATCTGCTGTGGGGATGCTGGCAGCCCTGAGCCTAGCAGCCCCTTCAACAACATC 840
I  G  S  A  V  G  M  L  A  A  L  S  L  A  A  P  F  N  N  I

      850     860     870     880     890     900
TATGCTGGCTTGTGGAGTTACAACAGCTGCCTTGCAATGCATCGCAATAGGAGGCATGTT 900
Y  A  G  L  W  S  Y  N  S  C  L  A  C  I  A  I  G  G  M  F

      910     920     930     940     950     960
TATGCTCTCACTTGGCAGACCCACCTTCTAGCAATTGCCTGTGCTTTCTTTTGTGCCTAC 960
Y  A  L  T  W  Q  T  H  L  L  A  I  A  C  A  F  F  C  A  Y

```

**Fig. S1.** The complete coding sequence of urea transporter (*UT*) from the buccopharyngeal epithelium of *Pelodiscus sinensis*.
